# Supplementary material for: Genotypes of Staphylococcus aureus Clinical Isolates Are Associated with Phenol-Soluble Modulin (PSM) Production
Source: MDPI journal article supplement (doi:10.3390/toxins14080556), 2022-08-15
Supplement: s1 [file s1]

# Supplementary Materials: Genotypes of *Staphylococcus aureus* Clinical Isolates Are Associated with Phenol-Soluble Modulin (PSM) Production

Harshad Lade, Sung Hee Chung, Yeonhee Lee, Hwang-Soo Joo and Jae-Seok Kim

**Table S1.** Genotypic characteristics and  $\delta$ -toxin production of MSSA clinical isolates.

| MSSA strains | <i>spa</i> type | $\delta$ -toxin production |
|--------------|-----------------|----------------------------|
| 24689        | t002            | +                          |
| 26136        | t005            | +                          |
| 24865        | t008            | +                          |
| 26782        | t019            | +                          |
| 27126        | t021            | +                          |
| 25139        | t084            | +                          |
| 25496        | t084            | +                          |
| 26486        | t084            | +                          |
| 26559        | t085            | +                          |
| 26641        | t085            | +                          |
| 24692        | t126            | +                          |
| 24899        | t126            | +                          |
| 24900        | t126            | +                          |
| 25157        | t126            | +                          |
| 27043        | t126            | +                          |
| 27254        | t126            | +                          |
| 25280        | t127            | -                          |
| 26768        | t177            | -                          |
| 25180        | t179            | -                          |
| 26704        | t179            | +                          |
| 26052        | t189            | +                          |
| 26253        | t189            | +                          |
| 26255        | t189            | +                          |
| 26331        | t189            | +                          |
| 26369        | t189            | -                          |
| 26537        | t189            | +                          |
| 27339        | t189            | +                          |
| 26340        | t304            | +                          |
| 24855        | t324            | -                          |
| 24901        | t324            | +                          |
| 25992        | t338            | +                          |
| 26653        | t338            | +                          |
| 25637        | t346            | +                          |
| 26287        | t363            | +                          |
| 26642        | t386            | +                          |
| 25499        | t416            | +                          |
| 26931        | t521            | +                          |
| 27078        | t571            | +                          |

|       |           |   |
|-------|-----------|---|
| 24915 | t1333     | + |
| 26170 | t1361     | + |
| 26153 | t1767     | + |
| 25350 | t1858     | + |
| 25351 | t1858     | + |
| 26281 | t1950     | - |
| 24722 | t4727     | - |
| 25930 | t4956     | + |
| 25106 | t10234    | + |
| 26612 | t10686    | + |
| 25619 | t12605    | + |
| 25025 | undefined | + |

+, present; -, absent.

**Table S2.** Genotypic characteristics and  $\delta$ -toxin production of MRSA clinical isolates.

| MRSA strains | <i>spa</i> type | SCC <i>mec</i> type | $\delta$ -toxin production |
|--------------|-----------------|---------------------|----------------------------|
| 24663        | t002            | II                  | -                          |
| 26180        | t002            | II                  | +                          |
| 26744        | t002            | II                  | +                          |
| 24651        | t008            | IV                  | +                          |
| 25250        | t008            | IV                  | +                          |
| 25773        | t008            | IV                  | +                          |
| 26154        | t008            | IV                  | +                          |
| 26928        | t008            | IV                  | +                          |
| 27310        | t008            | IV                  | +                          |
| 25870        | t034            | V                   | +                          |
| 26792        | t062            | II                  | +                          |
| 25754        | t111            | II                  | +                          |
| 26558        | t111            | II                  | -                          |
| 27106        | t111            | II                  | -                          |
| 27179        | t111            | II                  | -                          |
| 24718        | t148            | IVA                 | +                          |
| 27186        | t148            | IVA                 | +                          |
| 25849        | t189            | IV                  | +                          |
| 26194        | t189            | IV                  | +                          |
| 26644        | t189            | IV                  | +                          |
| 26930        | t189            | IV                  | +                          |
| 24962        | t242            | IV                  | +                          |
| 26725        | t264            | II                  | -                          |
| 24958        | t304            | IV                  | +                          |
| 26538        | t304            | IV                  | +                          |
| 25029        | t324            | IVA                 | +                          |
| 26393        | t324            | IVA                 | +                          |
| 26421        | t324            | IVA                 | +                          |
| 27331        | t324            | IVA                 | +                          |
| 25027        | t664            | IVA                 | -                          |
| 25944        | t664            | IVA                 | +                          |
| 26031        | t664            | IVA                 | +                          |

|         |       |     |   |
|---------|-------|-----|---|
| 26507   | t893  | II  | + |
| 25274   | t1081 | V   | + |
| 24952   | t1154 | II  | - |
| 25620   | t1560 | II  | + |
| 24733   | t1784 | IV  | + |
| 25135   | t1784 | IV  | + |
| 26216   | t1784 | IV  | + |
| 26987-2 | t1784 | IV  | + |
| 27288   | t1784 | IV  | + |
| 25437   | t2460 | II  | - |
| 25606   | t2460 | II  | - |
| 25625   | t2460 | II  | - |
| 25681   | t2460 | II  | - |
| 25753   | t2460 | II  | - |
| 26088   | t2460 | II  | - |
| 26209   | t2460 | II  | - |
| 26256   | t2460 | II  | - |
| 26271   | t2460 | II  | - |
| 26793   | t2460 | II  | - |
| 24830   | t3092 | V   | + |
| 25580   | t4359 | IVA | - |
| 25899   | t9353 | II  | - |
| 26101   | t9353 | II  | + |
| 26139   | t9353 | II  | + |

+, present; -, absent.

**Table S3.** Variation in PSM production between MSSA and MRSA strains.

| PSM subtype                    | Average PSM production ( $\mu$ M) |                       | <i>P</i> value |
|--------------------------------|-----------------------------------|-----------------------|----------------|
|                                | MSSA ( <i>n</i> = 50)             | MRSA ( <i>n</i> = 56) |                |
| <b>PSM<math>\alpha</math>1</b> | 1.229                             | 0.882                 | 0.036          |
| PSM $\alpha$ 2                 | 0.929                             | 0.635                 | 0.030          |
| PSM $\alpha$ 3                 | 1.693                             | 1.116                 | 0.061          |
| PSM $\alpha$ 4                 | 1.462                             | 1.056                 | 0.055          |
| PSM $\beta$ 1                  | 1.925                             | 1.434                 | 0.048          |
| PSM $\beta$ 2                  | 1.018                             | 0.820                 | 0.141          |
| $\delta$ -toxin                | 6.811                             | 5.391                 | 0.058          |

Averaged PSM production by MSSA and MRSA strains. Kruskal–Wallis test was used to calculate the difference in production. There was no significant difference in PSM $\alpha$ 3, PSM $\alpha$ 4, PSM $\beta$ 2, and  $\delta$ -toxin production between MSSA and MRSA strains, but MSSA strains produce higher amounts of PSM $\alpha$ 1, PSM $\alpha$ 2, and PSM $\beta$ 1 than MRSA, *P* > 0.05.

**Table S4.** Variation in PSM production between SCCmec type strains of MRSA.

| PSM subtype | Average PSM production (μM) |                       |                        |                     |
|-------------|-----------------------------|-----------------------|------------------------|---------------------|
|             | SCCmec II<br>(n = 25)       | SCCmec IV<br>(n = 18) | SCCmec IVA<br>(n = 10) | SCCmec V<br>(n = 3) |
| PSMα1       | 0.120                       | 1.097                 | 2.272                  | 1.304               |
| PSMα2       | 0.068                       | 0.902                 | 1.459                  | 1.014               |
| PSMα3       | 0.058                       | 1.883                 | 2.100                  | 2.043               |
| PSMα4       | 0.073                       | 1.572                 | 2.308                  | 1.984               |
| PSMβ1       | 0.395                       | 1.758                 | 3.220                  | 2.189               |
| PSMβ2       | 0.488                       | 0.731                 | 1.730                  | 1.090               |
| δ-toxin     | 0.785                       | 7.891                 | 11.390                 | 8.790               |

Averaged PSM production by SCCmec type strains of MRSA. The SCCmec type IV, IVA, and V strains had significantly higher PSMα1-α4, PSMβ1-β2, and δ-toxin production than SCCmec type II strains.

**Table S5.** Variation in PSM production between similar *spa* type strains of MSSA and MRSA.

| <i>spa</i> type and PSMs      | Average PSM production (μM) |              | <i>P</i> value |
|-------------------------------|-----------------------------|--------------|----------------|
| <i>spa</i> type t002 (n = 4)  | MSSA (n = 1)                | MRSA (n = 3) |                |
| PSMα1                         | 0.210                       | 0.242        | 0.655          |
| PSMα2                         | 0.352                       | 0.026        | 0.180          |
| PSMα3                         | 0.429                       | 0.043        | 0.180          |
| PSMα4                         | 0.246                       | 0.097        | 0.180          |
| PSMβ1                         | 0.340                       | 0.083        | 0.180          |
| PSMβ2                         | 0.345                       | 0.282        | 0.655          |
| δ-toxin                       | 9.211                       | 0.331        | 0.180          |
| <i>spa</i> type t008 (n = 7)  | MSSA (n = 1)                | MRSA (n = 6) |                |
| PSMα1                         | 2.923                       | 0.985        | 0.134          |
| PSMα2                         | 1.958                       | 0.974        | 0.134          |
| PSMα3                         | 3.616                       | 2.147        | 0.134          |
| PSMα4                         | 3.434                       | 1.985        | 0.134          |
| PSMβ1                         | 2.440                       | 1.374        | 0.134          |
| PSMβ2                         | 1.012                       | 0.546        | 0.134          |
| δ-toxin                       | 11.470                      | 10.343       | 0.134          |
| <i>spa</i> type t189 (n = 11) | MSSA (n = 7)                | MRSA (n = 4) |                |
| PSMα1                         | 2.505                       | 2.315        | 0.850          |
| PSMα2                         | 1.824                       | 1.478        | 0.345          |
| PSMα3                         | 3.725                       | 3.149        | 0.571          |
| PSMα4                         | 2.642                       | 2.193        | 0.186          |
| PSMβ1                         | 2.849                       | 2.368        | 0.450          |
| PSMβ2                         | 1.017                       | 1.108        | 1.000          |
| δ-toxin                       | 5.427                       | 6.328        | 0.850          |
| <i>spa</i> type t304 (n = 3)  | MSSA (n = 1)                | MRSA (n = 2) |                |
| PSMα1                         | 1.469                       | 1.024        | 1.000          |
| PSMα2                         | 1.408                       | 0.924        | 0.221          |
| PSMα3                         | 3.700                       | 1.854        | 0.221          |
| PSMα4                         | 3.542                       | 1.644        | 0.221          |
| PSMβ1                         | 2.771                       | 2.174        | 1.000          |
| PSMβ2                         | 0.361                       | 0.753        | 0.221          |
| δ-toxin                       | 13.430                      | 9.328        | 0.221          |
| <i>spa</i> type t324 (n = 6)  | MSSA (n = 2)                | MRSA (n = 4) |                |
| PSMα1                         | 0.031                       | 2.849        | 0.064          |
| PSMα2                         | 0.015                       | 1.752        | 0.064          |

|                 |       |        |       |
|-----------------|-------|--------|-------|
| PSM $\alpha$ 3  | 0.014 | 1.773  | 0.064 |
| PSM $\alpha$ 4  | 0.005 | 2.413  | 0.064 |
| PSM $\beta$ 1   | 0.188 | 4.506  | 0.064 |
| PSM $\beta$ 2   | 0.904 | 2.228  | 0.165 |
| $\delta$ -toxin | 0.544 | 14.400 | 0.064 |

Averaged PSM production by similar *spa* type strains of MSSA and MRSA. The separate Kruskal–Wallis test was used to calculate the difference in production. There was no significant difference in PSM $\alpha$ 1– $\alpha$ 4, PSM $\beta$ 1– $\beta$ 2, and  $\delta$ -toxin production between similar *spa* type strains of MSSA and MRSA,  $P > 0.05$ .

**Table S6.** PSM production by different *spa* type strains of *S. aureus* clinical isolates.

| <i>spa</i> types   | PSM $\alpha$ 1 | PSM $\alpha$ 2 | PSM $\alpha$ 3 | PSM $\alpha$ 4 | PSM $\beta$ 1 | PSM $\beta$ 2 | $\delta$ -toxin |
|--------------------|----------------|----------------|----------------|----------------|---------------|---------------|-----------------|
| <b>MSSA</b>        |                |                |                |                |               |               |                 |
| t084 ( $n = 3$ )   | 1.065          | 0.707          | 1.547          | 1.139          | 2.950         | 1.542         | 3.658           |
| t085 ( $n = 2$ )   | 1.476          | 1.159          | 2.635          | 1.473          | 5.540         | 3.363         | 2.077           |
| t126 ( $n = 6$ )   | 0.932          | 0.779          | 1.207          | 1.381          | 1.338         | 0.675         | 11.489          |
| t179 ( $n = 2$ )   | 0.159          | 0.210          | 0.172          | 0.184          | 0.402         | 0.979         | 7.515           |
| t338 ( $n = 2$ )   | 0.584          | 0.598          | 0.188          | 0.607          | 1.125         | 1.192         | 9.383           |
| t1858 ( $n = 2$ )  | 1.513          | 1.127          | 2.214          | 1.697          | 2.424         | 1.254         | 12.048          |
| <b>MRSA</b>        |                |                |                |                |               |               |                 |
| t111 ( $n = 4$ )   | 0.015          | 0.008          | 0.007          | 0.000          | 0.184         | 0.638         | 0.073           |
| t2460 ( $n = 10$ ) | 0.033          | 0.014          | 0.013          | 0.013          | 0.290         | 0.474         | 0.000           |
| t9353 ( $n = 3$ )  | 0.199          | 0.127          | 0.122          | 0.128          | 0.622         | 0.256         | 0.873           |
| t1784 ( $n = 5$ )  | 0.403          | 0.364          | 0.653          | 0.583          | 1.541         | 0.701         | 5.305           |
| t148 ( $n = 2$ )   | 3.240          | 1.868          | 3.028          | 3.101          | 4.138         | 1.998         | 13.108          |
| t664 ( $n = 3$ )   | 1.615          | 1.283          | 2.617          | 2.408          | 1.811         | 1.227         | 10.028          |

Averaged PSM production by different *spa* type strains.

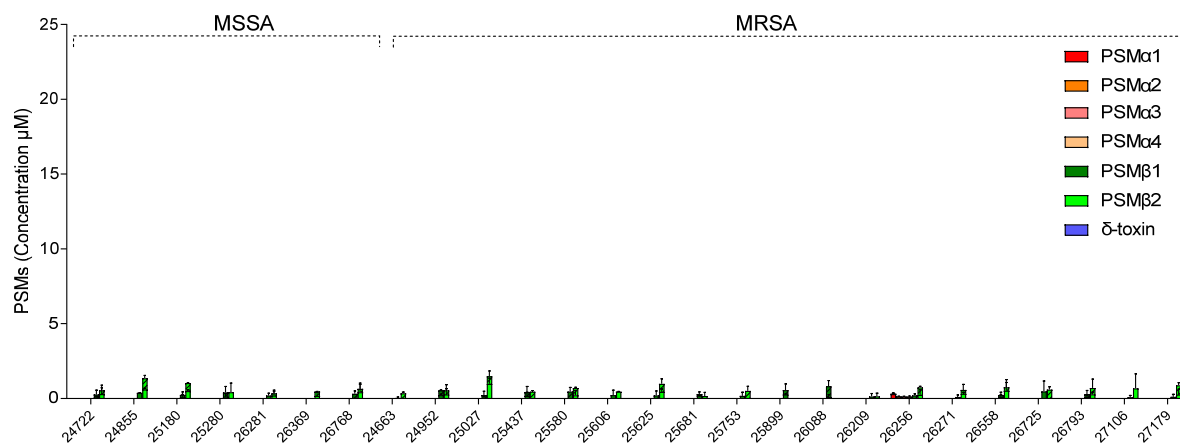

**Figure S1.**  $\delta$ -toxin deficient MSSA ( $n = 7$ ) and MRSA ( $n = 19$ ) strains. PSM production was measured by LC-MS and shown as the sum of formyl- and deformylated forms. All the  $\delta$ -toxin deficient strains also showed no production of PSM $\alpha$ 1– $\alpha$ 4, with strain 26256 as exception. Most of the  $\delta$ -toxin deficient strains produced low quantity of PSM $\beta$ 1– $\beta$ 2.
